# Supplementary material
Source: publisher figshare collection journal article supplement (https://acs.figshare.com/ndownloader/files/22898102)
Supplement: Supplementary file 1 [file 22898102]

# Supporting Information

## Double ring-closing approach for the synthesis of 2,3,6,7-substituted anthracene derivatives

Birgit Meindl,<sup>a,+</sup> Katharina Pfennigbauer,<sup>b,+</sup> Berthold Stöger,<sup>c</sup> Martin Heeney,<sup>b</sup> Florian Glöcklhofer<sup>b,\*</sup>

<sup>+</sup> contributed equally

<sup>a</sup> Institute of Applied Synthetic Chemistry, TU Wien, Getreidemarkt 9/163, 1060 Vienna, Austria

<sup>b</sup> Department of Chemistry and Centre for Plastic Electronics, Imperial College London, Molecular Sciences Research Hub, 80 Wood Lane, London W12 0BZ, United Kingdom

<sup>c</sup> X-Ray Center, TU Wien, Getreidemarkt 9, 1060 Vienna, Austria

\* E-mail: f.glocklhofer@imperial.ac.uk

### Table of Contents

|   |                                                      |     |
|---|------------------------------------------------------|-----|
| 1 | <sup>1</sup> H and <sup>13</sup> C NMR spectra ..... | S2  |
| 2 | Crystallography .....                                | S8  |
| 3 | Photochromic effect .....                            | S10 |
| 4 | References .....                                     | S11 |

## 1 $^1\text{H}$ and $^{13}\text{C}$ NMR spectra

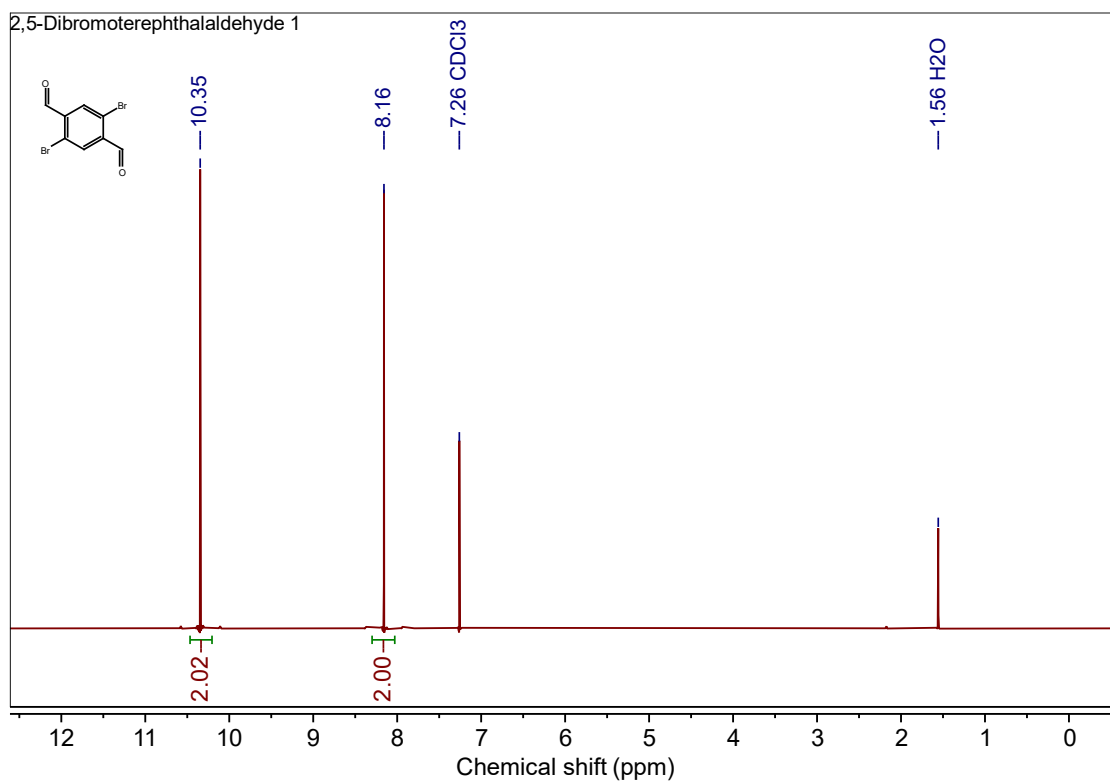

**Figure S1.**  $^1\text{H}$  NMR (400 MHz,  $\text{CDCl}_3$ ) of 2,5-dibromoterephthalaldehyde **1**.

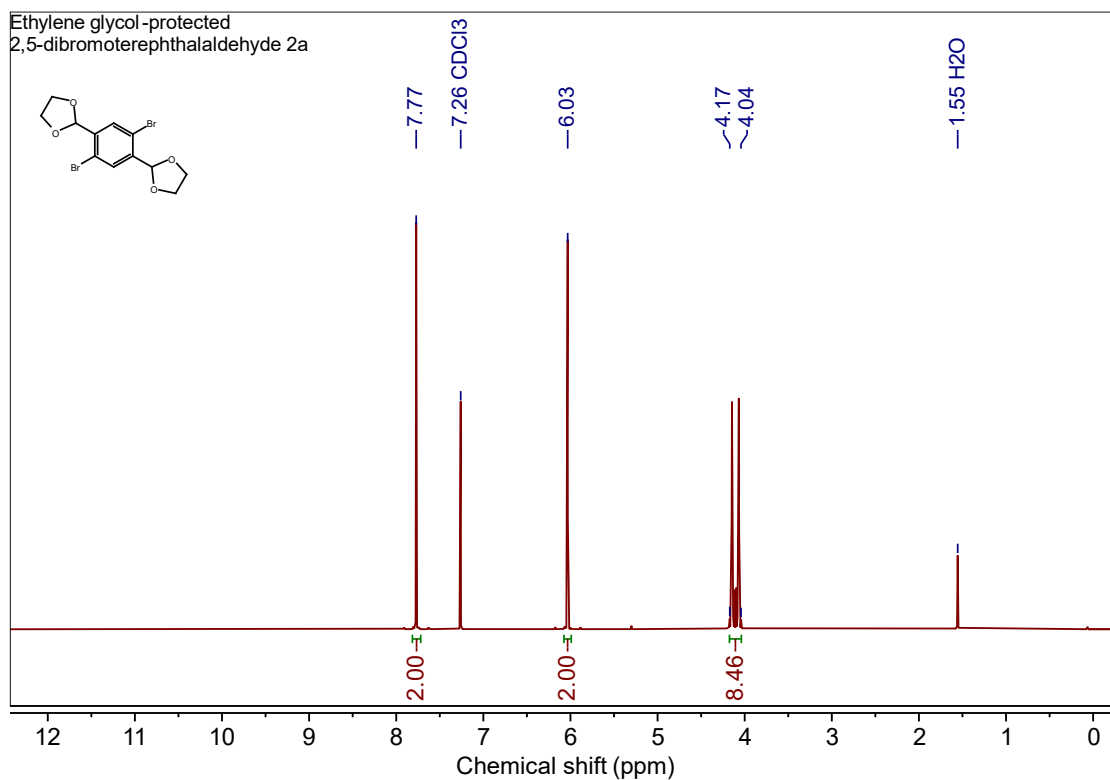

**Figure S2.**  $^1\text{H}$  NMR (600 MHz,  $\text{CDCl}_3$ ) of ethylene glycol-protected 2,5-dibromoterephthalaldehyde **2a**.

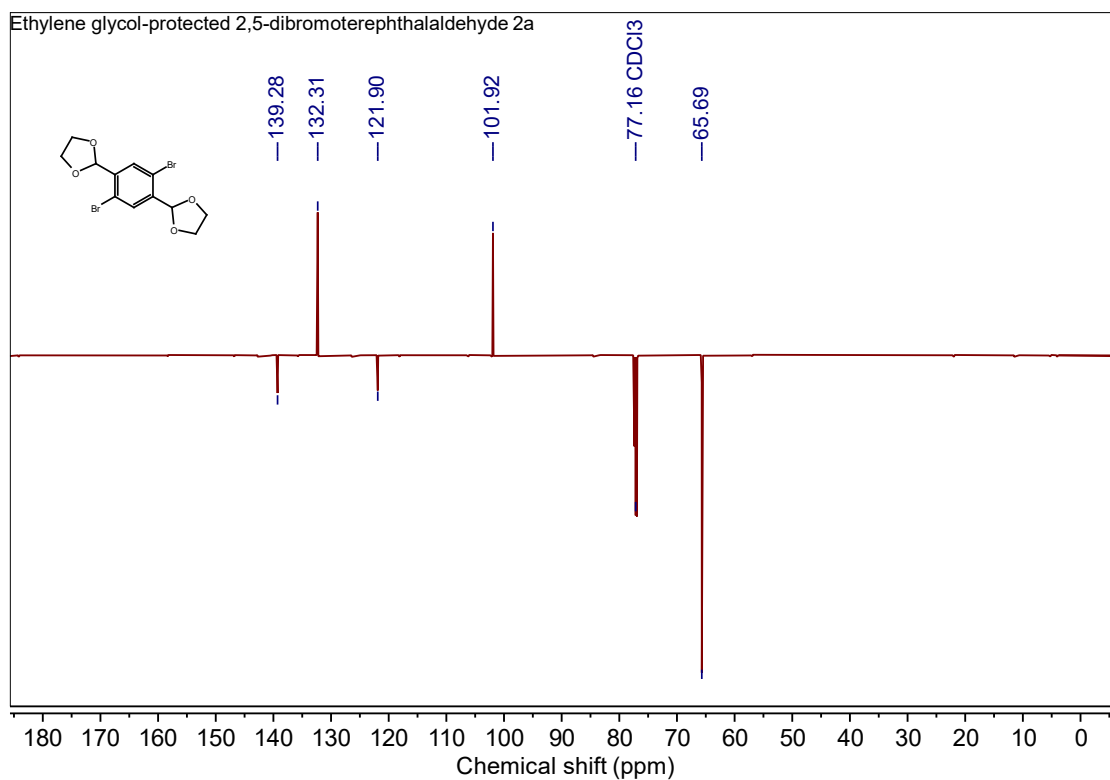

**Figure S3.**  $^{13}\text{C}\{^1\text{H}\}$  (APT) NMR (150 MHz,  $\text{CDCl}_3$ ) of ethylene glycol-protected 2,5-dibromoterephthalaldehyde **2a**.

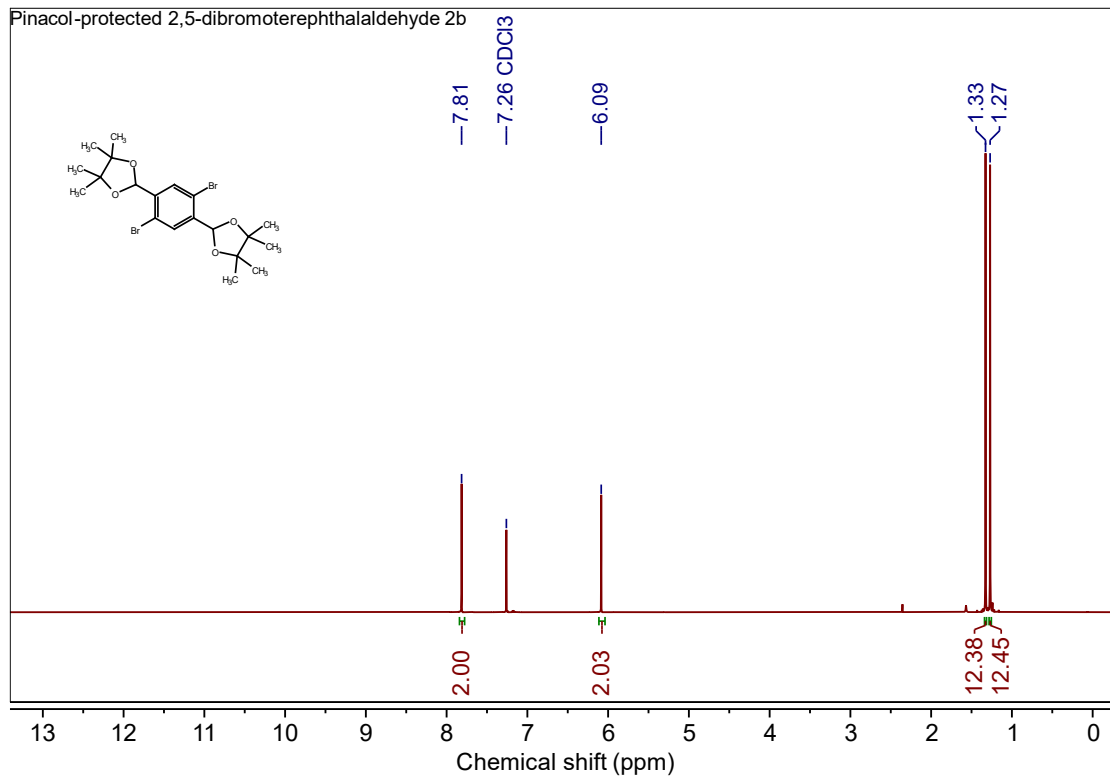

**Figure S4.**  $^1\text{H}$  NMR (600 MHz,  $\text{CDCl}_3$ ) of pinacol-protected 2,5-dibromoterephthalaldehyde **2b**.

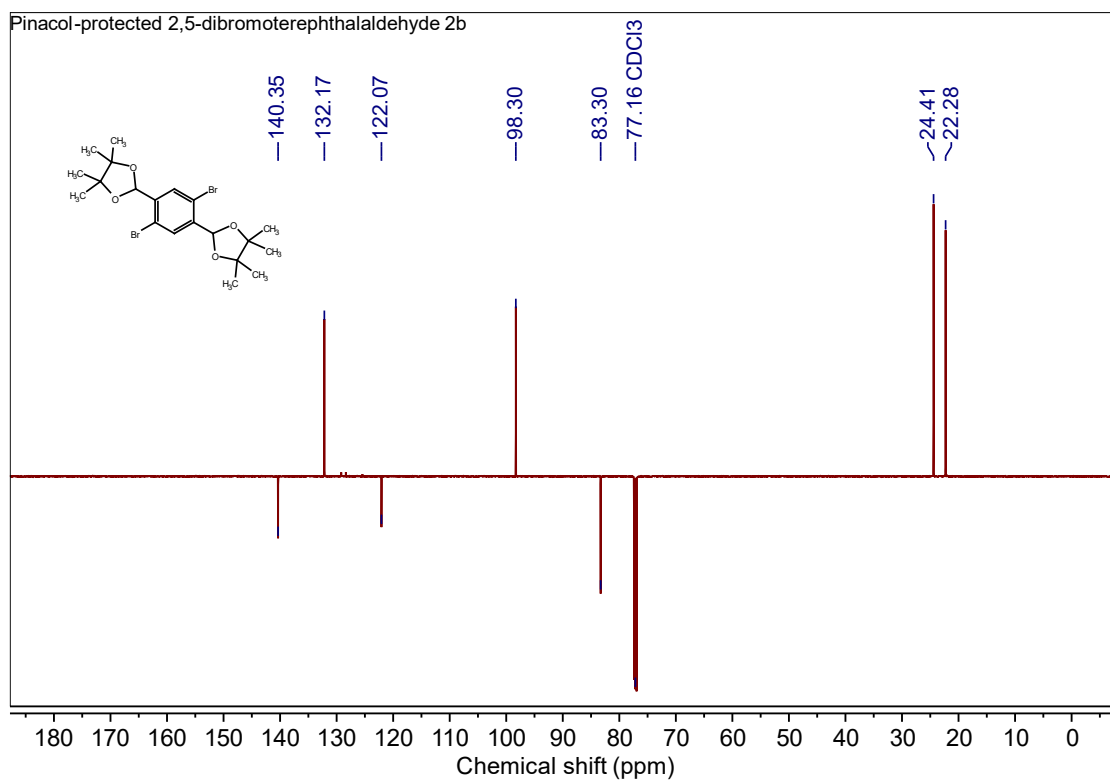

**Figure S5.**  $^{13}\text{C}\{^1\text{H}\}$  (APT) NMR (150 MHz,  $\text{CDCl}_3$ ) of pinacol-protected 2,5-dibromoterephthalaldehyde **2b**.

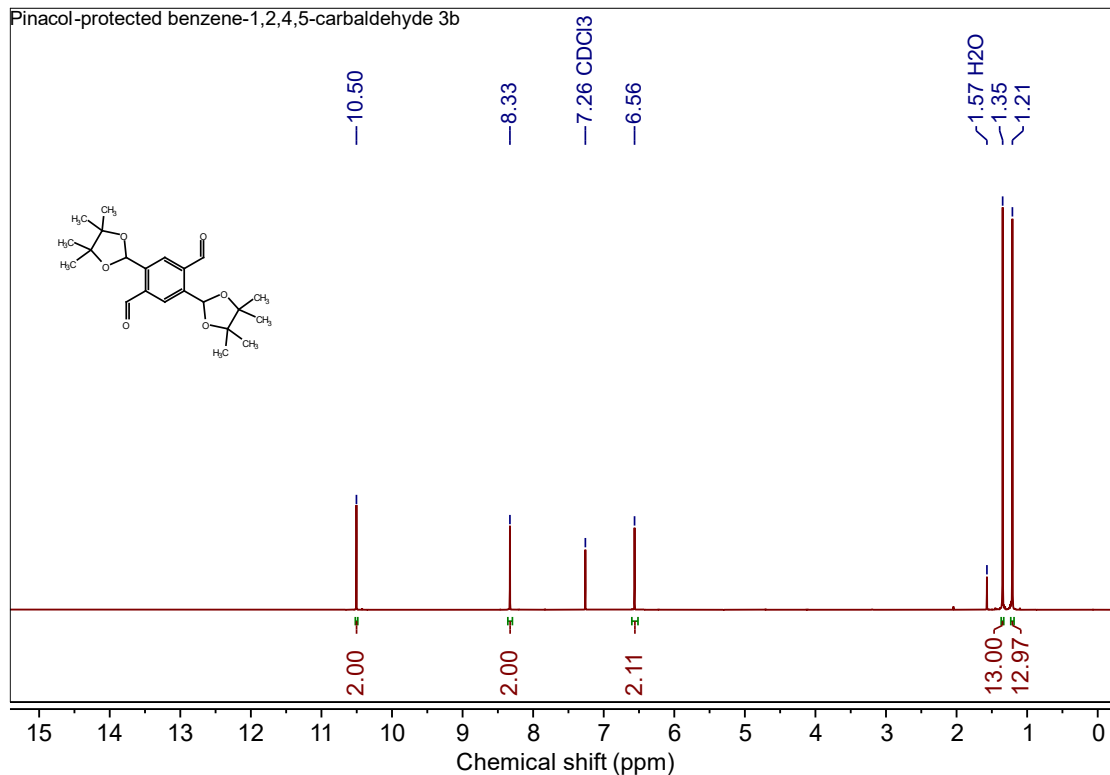

**Figure S6.**  $^1\text{H}$  NMR (600 MHz,  $\text{CDCl}_3$ ) of pinacol-protected 1,2,4,5-benzenetetracarbaldehyde **3b**.

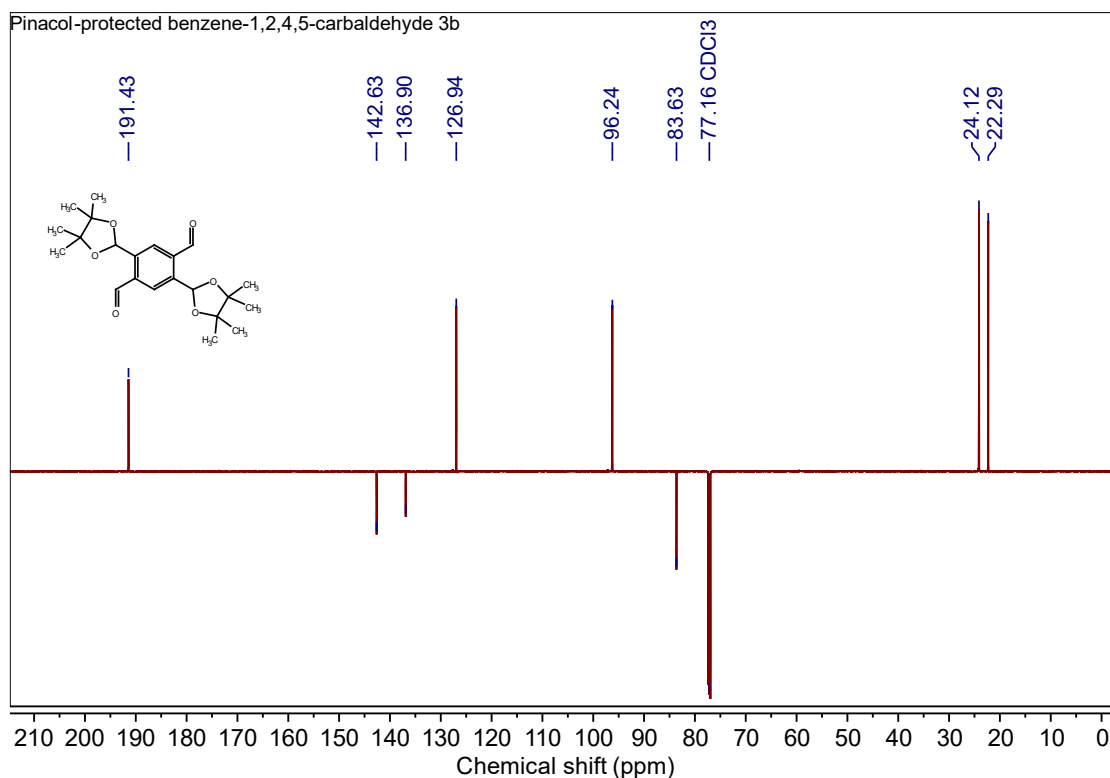

**Figure S7.** <sup>13</sup>C{<sup>1</sup>H} (APT) NMR (150 MHz, CDCl<sub>3</sub>) of pinacol-protected 1,2,4,5-benzenetetracarbaldehyde **3b**.

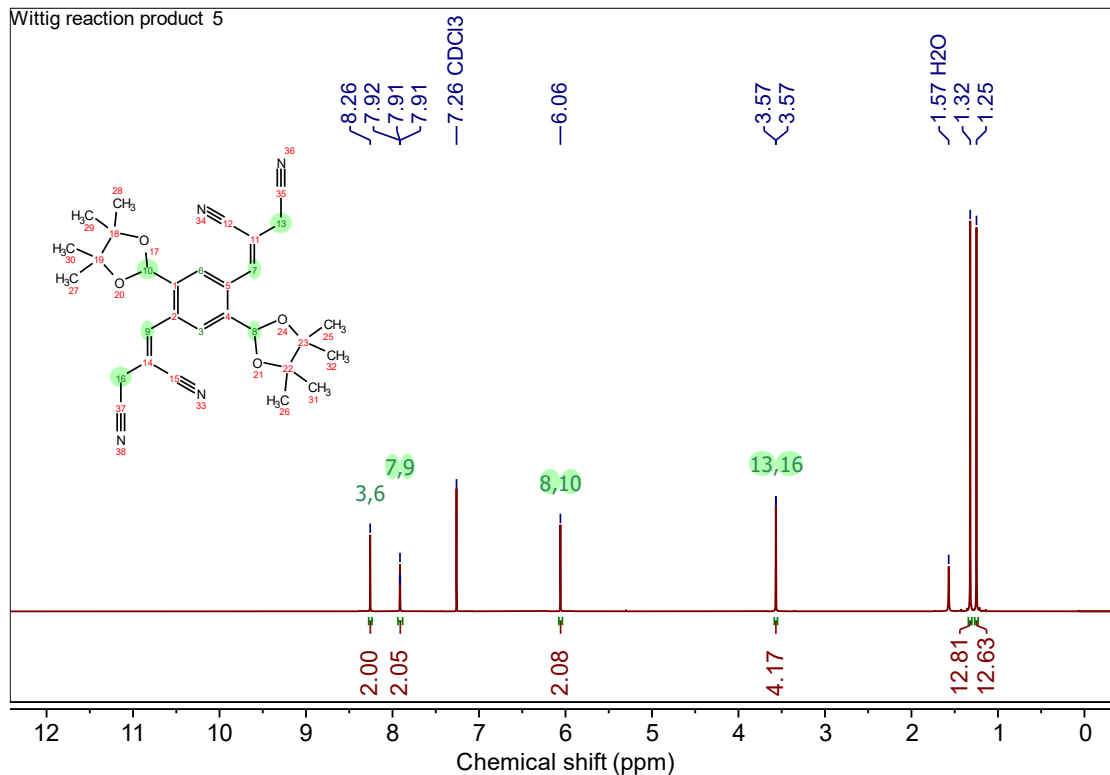

**Figure S8.** <sup>1</sup>H NMR (600 MHz, CDCl<sub>3</sub>) of Wittig reaction product **5**.



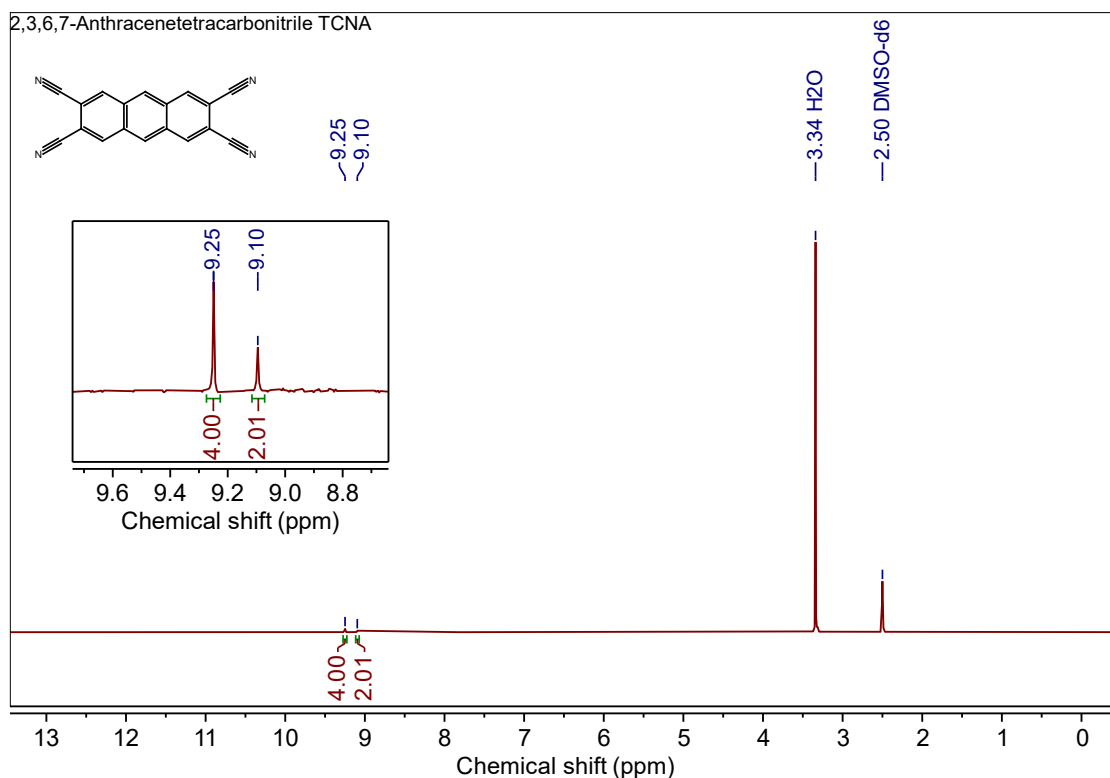

**Figure S11.**  $^1\text{H}$  NMR (400 MHz, DMSO- $d_6$ ) of pure 2,3,6,7-anthracenetetracarbonitrile **TCNA** precipitating initially during evaporation of the solvent after work-up.

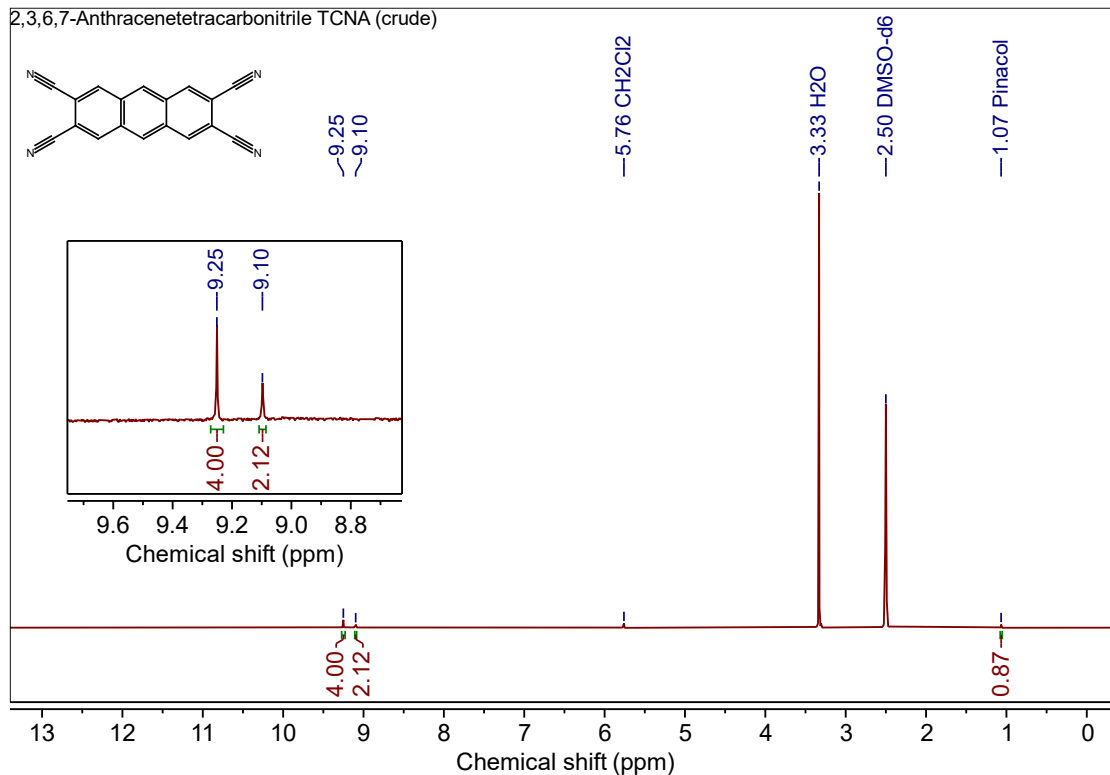

**Figure S12.**  $^1\text{H}$  NMR (400 MHz, DMSO- $d_6$ ) of crude 2,3,6,7-anthracenetetracarbonitrile **TCNA** prior to drying in vacuo.

## 2 Crystallography

Single crystals of compound **2b** were obtained directly from its preparation in toluene by allowing the concentrated reaction solution to slowly cool to room temperature. Single crystals of compound **3b** were obtained by slow solvent evaporation of a solution prepared by dissolving the compound in diethyl ether at room temperature and diluting the solution with *n*-heptane to obtain a 1:1 solvent mixture.

Both compounds crystallized in the same space group type ( $P2_1/c$  respectively  $P2_1/n$ ) with one crystallographically unique molecule located on a centre of inversion. The molecules possess nearly identical conformations (Figure S13), but the acetal group in **2b** is slightly more out-of-plane (angle of C–O bond to the least squares plane defined by the C atoms of the benzene ring:  $18.12(6)^\circ$  vs.  $9.42(6)^\circ$ ). The packing of both molecules, however, is structurally unrelated (Figure S14).

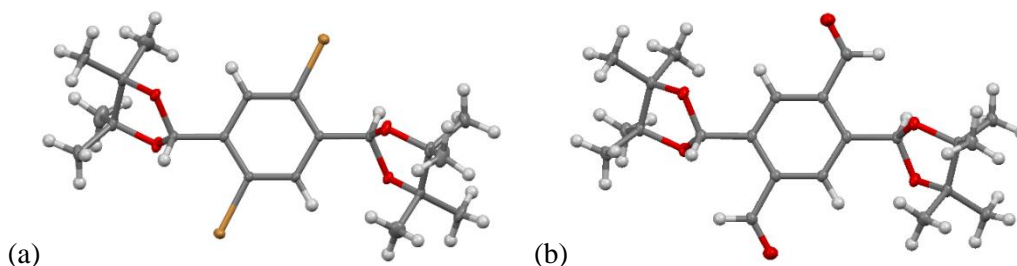

**Figure S13.** Crystal structures of (a) compound **2b** and (b) precursor **3b** viewed normal to the plane of the benzene rings. C (gray), O (red) and Br (brown) atoms are represented by ellipsoids drawn at the 50% probability levels, H (white) atoms by spheres of arbitrary radius.

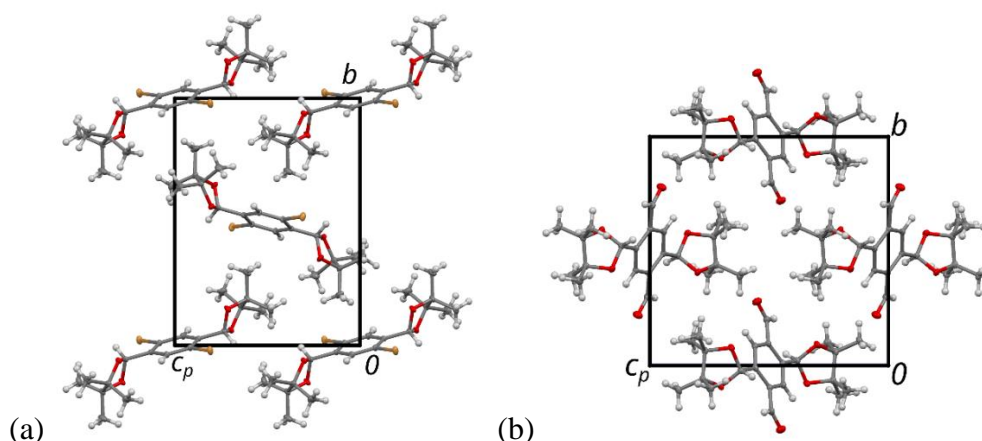

**Figure S14.** Crystal structures of (a) compound **2b** and (b) precursor **3b** viewed down [100]. C (gray), O (red) and Br (brown) atoms are represented by ellipsoids drawn at the 50% probability levels, H (white) atoms by spheres of arbitrary radius.



Intensity data of compounds **2b** and **3b** (CCDC 1991590 and 1991591) were collected on a Kappa APEX II CCD diffractometer system<sup>1</sup> in a dry stream of nitrogen at 100 K using graphite monochromatized MoK $\alpha$  radiation. Frame data were reduced to intensity values with SAINT-Plus<sup>1</sup> and a correction for absorption effects applied using the multi-scan approach implemented in SADABS.<sup>1</sup>

The structures were solved with SHELXT<sup>2</sup> and refined against  $F^2$  using Jana2006.<sup>3</sup> Non-H atoms were refined with anisotropic displacement parameters. H atoms were placed at calculated positions and refined as riding on the parent C atoms.

**Table S1.** Crystal data for compounds **2b** and **3b**.

| Compound                                                                   | <b>2b</b>                                                      | <b>3b</b>                                      |
|----------------------------------------------------------------------------|----------------------------------------------------------------|------------------------------------------------|
| CCDC number                                                                | 1991590                                                        | 1991591                                        |
| Chemical formula                                                           | C <sub>20</sub> H <sub>28</sub> Br <sub>2</sub> O <sub>4</sub> | C <sub>22</sub> H <sub>30</sub> O <sub>6</sub> |
| $M_r$                                                                      | 492.2                                                          | 390.5                                          |
| Crystal system, space group                                                | Monoclinic, $P2_1/n$                                           | Monoclinic, $P2_1/c$                           |
| Temperature (K)                                                            | 100                                                            | 100                                            |
| $a, b, c$ (Å)                                                              | 7.1153 (3), 14.0361 (7), 10.9661 (5)                           | 6.3185 (3), 12.4574 (4), 13.2815 (5)           |
| $\beta$ (°)                                                                | 106.5764 (13)                                                  | 102.049 (2)                                    |
| $V$ (Å <sup>3</sup> )                                                      | 1049.68 (8)                                                    | 1022.38 (7)                                    |
| $Z$                                                                        | 2                                                              | 2                                              |
| Radiation type                                                             | Mo $K\alpha$                                                   | Mo $K\alpha$                                   |
| $\mu$ (mm <sup>-1</sup> )                                                  | 3.88                                                           | 0.09                                           |
| Crystal size (mm)                                                          | 0.48 $\times$ 0.25 $\times$ 0.12                               | 0.45 $\times$ 0.33 $\times$ 0.26               |
| Data collection                                                            |                                                                |                                                |
| Diffractometer                                                             | Bruker <i>KAPPA APEX II</i> CCD                                | Bruker <i>KAPPA APEX II</i> CCD                |
| Absorption correction                                                      | Multi-scan<br><i>SADABS</i>                                    | Multi-scan<br><i>SADABS</i>                    |
| $T_{\min}, T_{\max}$                                                       | 0.16, 0.63                                                     | 0.96, 0.98                                     |
| No. of measured, independent and observed [ $I > 3\sigma(I)$ ] reflections | 39812, 8828, 5900                                              | 7705, 2985, 2351                               |
| $R_{\text{int}}$                                                           | 0.034                                                          | 0.025                                          |
| $(\sin \theta/\lambda)_{\max}$ (Å <sup>-1</sup> )                          | 1.003                                                          | 0.709                                          |
| Refinement                                                                 |                                                                |                                                |
| $R[F_2 > 2\sigma(F_2)], wR(F_2), S$                                        | 0.029, 0.091, 1.26                                             | 0.040, 0.111, 1.60                             |
| No. of reflections                                                         | 8828                                                           | 2985                                           |
| No. of parameters                                                          | 118                                                            | 127                                            |
| H-atom treatment                                                           | H-atom parameters constrained                                  | H-atom parameters constrained                  |
| $\Delta\rho_{\max}, \Delta\rho_{\min}$ (e Å <sup>-3</sup> )                | 1.26, -1.10                                                    | 0.36, -0.19                                    |

### 3 Photochromic effect

Single crystals and powders of **3b** rapidly turn from colorless to violet (Figure S15) when irradiated with sunlight. The color change persisted for multiple days and permeated the whole crystal. Under a polarizing microscope, the irradiated crystals were found to be dichroic: the violet color was only observed for specific polarization states with respect to the orientation of the crystal. For other polarization states, the irradiated crystals remained colorless. Thus, we concluded that the coloration is an ordered change of the crystal structure. However, no differences were observed in the diffraction patterns and crystal structures derived from colorless and dark violet crystals (interatomic distances changed by less than 0.25%). Since a purely electronic effect is unlikely owing to the very slow decay, we believe that only a tiny fraction of the molecules is affected and that these few molecules nevertheless lead to an intense coloration. Interestingly, dissolving the violet crystals in  $\text{CDCl}_3$ , a colorless solution was obtained, which did not show any differences in  $^1\text{H}$  NMR measurements to a solution of colorless crystals in the same solvent. Further in-depth studies are required for a conclusive explanation of this photochromic effect.

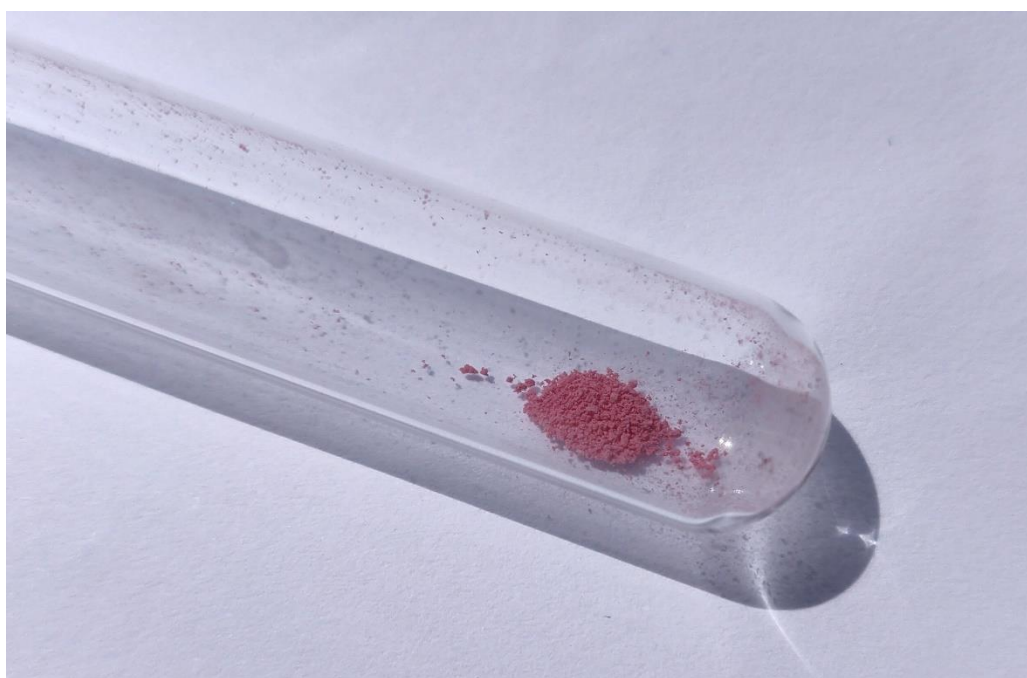

**Figure S15.** Picture of the initially white compound **3b** after a few seconds of irradiation with sunlight.

## 4 References

1. Bruker Analytical X-ray Instruments, Inc., Madison, Wisconsin, USA, **2019**.
2. Sheldrick, G. M., SHELXT - Integrated space-group and crystal-structure determination, *Acta Crystallogr., Sect. A* **2015**, *71* (1), 3-8. doi:10.1107/S2053273314026370
3. Petříček, V.; Dušek, M.; Palatinus, L., Crystallographic computing system JANA2006: general features, *Z. Kristallogr. - Cryst. Mater.* **2014**, *229* (5), 345-352.
